# Supplementary material for: Human Infection with Candidatus Neoehrlichia mikurensis, China
Source: PubMed Central journal article supplement (PMC3471638; doi:10.3201/eid1810.120594), 2012-10
Supplement: 12-0594-Techapp-s1.pdf [file 12-0594-Techapp-s1.pdf]

# Human Infection with *Candidatus* *Neoehrlichia mikurensis*, China

## Technical Appendix

### PCR, morphologic, and serologic procedures used for detection of *Candidatus* *Neoehrlichia mikurensis*, Mudanjiang, China

#### PCR

For broad-range assay, a nested PCR specific for the 16S rRNA (*rrs*) gene was used to detect all known species of the family *Anaplasmataceae* (Technical Appendix Table). PCR amplifications were performed in a 30- $\mu$ L reaction volume in GeneAmp PCR System 9700 (Applied Biosystems, Foster City, CA, USA).

For initial amplification, the reaction mixture contained 0.8  $\mu$ mol/L each of primers Eh-out1 (1) and 3-17U, 200 mmol/L of each dNTP, 1 unit of Taq polymerase, 3  $\mu$ L of 1 $\times$  PCR buffer, and 3  $\mu$ L of purified DNA. Cycling conditions were an initial 5-min denaturation at 94°C; 40 cycles at 94°C for 40 s, 55°C for 40 s, and 72°C for 1 min 45 s; and a final extension at 72°C for 7 min.

For nested amplification, the components were similar to those used in the initial amplification, except that 0.5  $\mu$ mol/L of EHR16SD and 0.5  $\mu$ mol/L of EHR16SR (2) were used as primers and 1  $\mu$ L of the primary PCR product was used as template. Cycling conditions were 94°C for 5 min; 35 cycles at 94°C for 30 s, 50°C for 30 s, and 72°C for 30 s; and a final at 72°C extension for 7 min. Nested amplicons were directly sequenced by using primers EHR16SD and EHR16SR.

For positive samples, 2 heminested PCRs were performed to amplify the entire *rrs* gene. Components and conditions in the 2 PCRs were similar to those in the nested PCR, except that

primers Eh-out1 and Eh-out2U were used to amplify 5'-end fragments, and primers Eh-out2fU and 3-17U were used to amplify 3'-end fragments. Amplified 5'-end fragments were sequenced by using primer Eh-out2U, and amplified 3'-end fragments were sequenced by using primers Eh-out2fU and CNM1050f.

For confirmation of identification of *Candidatus Neoehrlichia mikurensis*, a nested PCR specific for the 60-kDa heat shock protein (*groEL*) gene was performed. Components in the nested PCR were the same as those used in amplification of the *rrs* gene. Primers HS3-f and HSVR (3) was used for the initial amplification. Primers groEL-2f and groEL-2r were used for nested amplification. Cycling conditions were 94°C for 5 min; 35 cycles at 94°C for 30 s, 55°C for 30 s, and 72°C for 1 min 30s; and a final extension at 72°C for 7 min. Nested amplicons were sequenced by using primers groEL-Sf and groEL-Sr.

All positive amplicons were purified by using E.Z.N.A Gel Extraction Kit (Omega Bio-Tek, Norcross, GA, USA). These amplicons were then sequenced by using an automated DNA sequencer (3730 DNA Sequencer; Applied Biosystems).

To minimize risk for contamination, template isolation and PCR were performed by using specified pipettor sets in separate rooms. Certified DNA/RNase-free filter barrier tips were used to prevent aerosol contamination. All PCRs were performed with appropriate controls.

#### **Morphologic Examination of Peripheral Blood Smears**

Fresh peripheral blood smears from patients with PCR-confirmed *Candidatus Neoehrlichia mikurensis* infection were stained with Wright-Giemsa (BaSO Diagnostics, Inc., Zhuhai, China) and examined with a light microscope (BX43; Olympus, Center Valley, PA, USA) for intracellular morulae.

#### **Serologic Testing**

Serum samples from patients with PCR-confirmed *Candidatus Neoehrlichia mikurensis* infection were tested by using an indirect immunofluorescence assay for IgG against *Anaplasma*

*phagocytophilum* (4), *Ehrlichia chaffeensis* (*Ehrlichia chaffeensis* IFA IgG Substrate Slide; Focus Diagnostics, Inc., Cypress, CA, USA), *Borrelia burgdorferi* (established in our laboratory), tick-borne encephalitis virus (5), and *Rickettsia heilongjiangensis* (6).

## References

1. Wen B, Jian R, Zhang Y, Chen R. Simultaneous detection of *Anaplasma marginale* and a new *Ehrlichia* species closely related to *Ehrlichia chaffeensis* by sequence analyses of 16S ribosomal DNA in *Boophilus microplus* ticks from Tibet. *J Clin Microbiol.* 2002;40:3286–90. [PubMed](#)  
<http://dx.doi.org/10.1128/JCM.40.9.3286-3290.2002>
2. Parola P, Roux V, Camicas JL, Baradji I, Brouqui P, Raoult D. Detection of *ehrlichiae* in African ticks by polymerase chain reaction. *Trans R Soc Trop Med Hyg.* 2000;94:707–8. [PubMed](#)  
[http://dx.doi.org/10.1016/S0035-9203\(00\)90243-8](http://dx.doi.org/10.1016/S0035-9203(00)90243-8)
3. Liz JS, Anderes L, Sumner JW, Massung RF, Gern L, Rutti B, et al. PCR detection of granulocytic ehrlichiae in *Ixodes ricinus* ticks and wild small mammals in western Switzerland. *J Clin Microbiol.* 2000;38:1002–7. [PubMed](#)
4. Zhan L, Cao WC, Jiang JF, Zhang XA, Liu YX, Wu XM, et al. *Anaplasma phagocytophilum* from rodents and sheep, China. *Emerg Infect Dis.* 2010;16:764–8. [PubMed](#)
5. Li ZT. Investigation of indirect immunofluorescence assay in the early diagnosis of tick-borne encephalitis patients [in Chinese]. *Chinese Journal of Preventive Medicine.* 1985;19:85–7.
6. Duan C, Meng Y, Wang X, Xiong X, Wen B. Exploratory study on pathogenesis of far-eastern spotted fever. *Am J Trop Med Hyg.* 2011;85:504–9. [PubMed](#)  
<http://dx.doi.org/10.4269/ajtmh.2011.10-0660>

---

Technical Appendix Table. Nucleotide sequences of primers used for detection of *Candidatus Neoehrlichia mikurensis* by PCR, China\*

| Gene | Primer | Sequence (5'→3') | Reference |
|------|--------|------------------|-----------|
|------|--------|------------------|-----------|

Technical Appendix Table. Nucleotide sequences of primers used for detection of *Candidatus Neoehrlichia mikurensis* by PCR, China\*

|              |                   |                              |              |
|--------------|-------------------|------------------------------|--------------|
| <i>rrs</i>   | Eh-out1 (ap)      | TTGAGAGTTTGATCCTGGCTCAGAACG  | (1)          |
|              | Eh-out2U (ap, s)  | CACCTCTACACTAGGAATTCCTACTATC | (1) modified |
|              | 3-17U (ap)        | WAAGGWGGTAATCCAGC            | (1) modified |
|              | EHR16SD (ap, s)   | GGTACCYACAGAAGAAGTCC         | (2)          |
|              | EHR16SR (ap, s)   | TAGCACTCATCGTTTACAGC         | (2)          |
|              | Eh-out2fU (ap, s) | GATAGTGGAATTCCTAGTGTAGAGGTG  | (1) modified |
|              | CNM1050f (s)      | TAACCCTGTCTTAGTTGCC          | This study   |
| <i>groEL</i> | HS3-f (ap)        | ATAGTYATGAAGGAGAGTGAT        | (3)          |
|              | HSVR (ap)         | TCAACAGCAGCTCTAGTWG          | (3)          |
|              | groEL-2f (ap)     | AAAGTTTAAGAGTTCGCCTC         | This study   |
|              | groEL-2r (ap)     | TCTACTTCGCTTGAACCACC         | This study   |
|              | groEL-Sf (s)      | TACAGTTGAAGAAAGTAAGGG        | This study   |
|              | groEL-Sr (s)      | CAAATAAGGCGATAGATAACC        | This study   |

\**rrs*, 16S rRNA; ap, amplification primer; s, sequencing primer; *groEL*, 60-kDa heat shock protein.
